# Supplementary material for: A New High-Throughput Screening Method to Detect Antimicrobial Volatiles from Metagenomic Clone Libraries
Source: MDPI journal article supplement (doi:10.3390/antibiotics9110726), 2020-10-22
Supplement: s1 [file s1]

Supplementary material

# A new high-throughput screening method to detect antimicrobial volatiles from metagenomic clone libraries

Franz Stocker <sup>1,2+</sup>, Melanie M. Obermeier <sup>1,2+</sup>, Katharina Resch <sup>1,2</sup>, Gabriele Berg <sup>1,2</sup>, Christina A. Müller Bogotá <sup>1,2\*</sup>

<sup>1</sup> Institute of Environmental Biotechnology, Graz University of Technology, Austria; gabriele.berg@tugraz.at

<sup>2</sup> Austrian Centre of Industrial Biotechnology, Austria; info@acib.at

\* Correspondence: christina.mueller@tugraz.at; Tel.: 0043 316 873 – 8310 (C.A.M.B.)

+ These authors contribute equally to the paper

## FIGURES

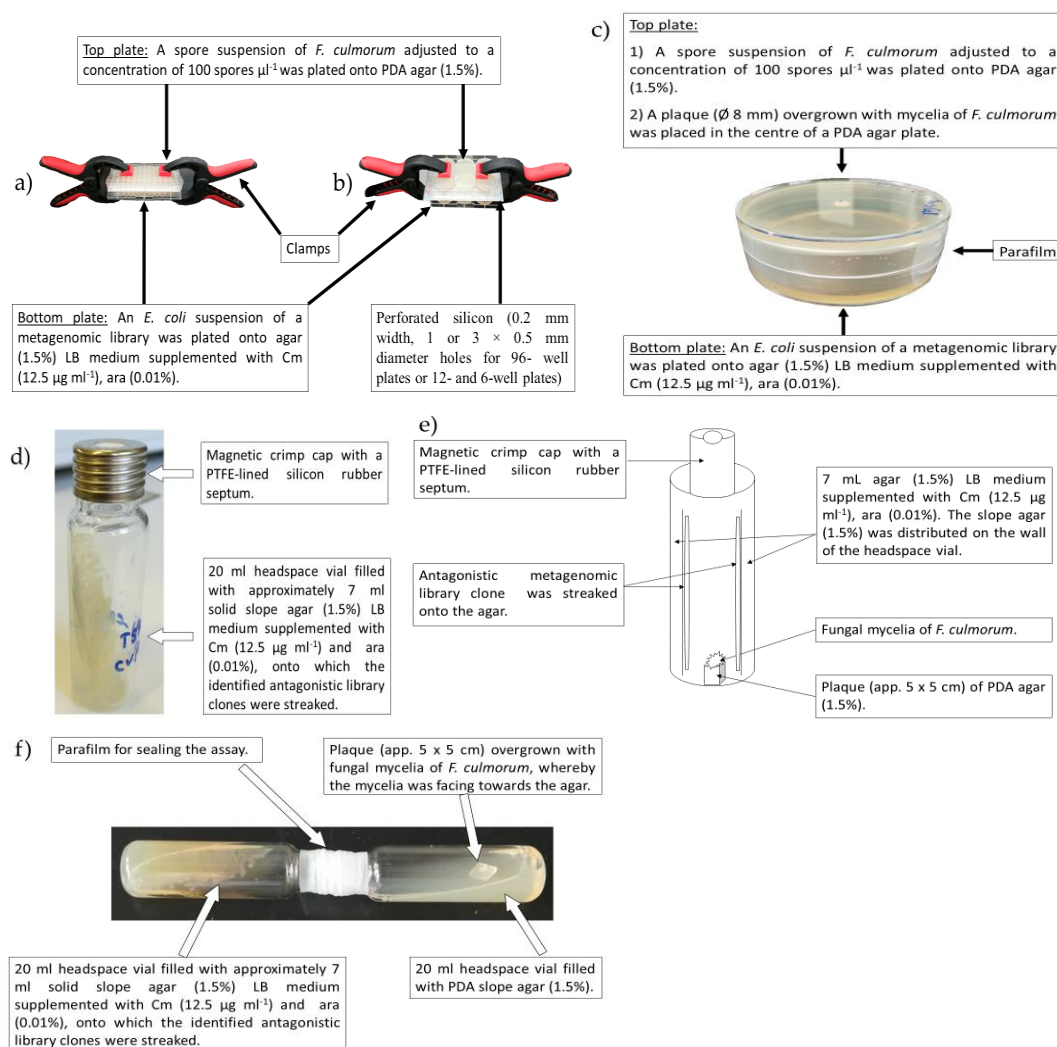

**Figure S1: Illustration of the different assays.** Set-up of the high-throughput Two Clamp VOCs Assay (htTCVA) (a), the Two Clamp VOCs Assay (TCVA) (b) and the Petri Dish VOCs Assay (PDVA) (c) for the high throughput screening and the set-up of single cultivation (d), one-vial co-cultivation (e) and separated co-cultivation (f) prior to the SPME GC-MS measurements.

### De novo sequencing and gene annotation

Metagenomic DNA inserts of positive tested clones were sequenced by the Göttingen Genomics Laboratory (Göttingen, Germany) as previously described [1]. In short, using the Illumina MiSeq technology (Illumina, California, USA) 300 bp reads were generated, quality filtered with Trimmomatic v0.36 [2], assembled with SPAdes v3.10.0 [3] and genes annotated with Prokka [4].

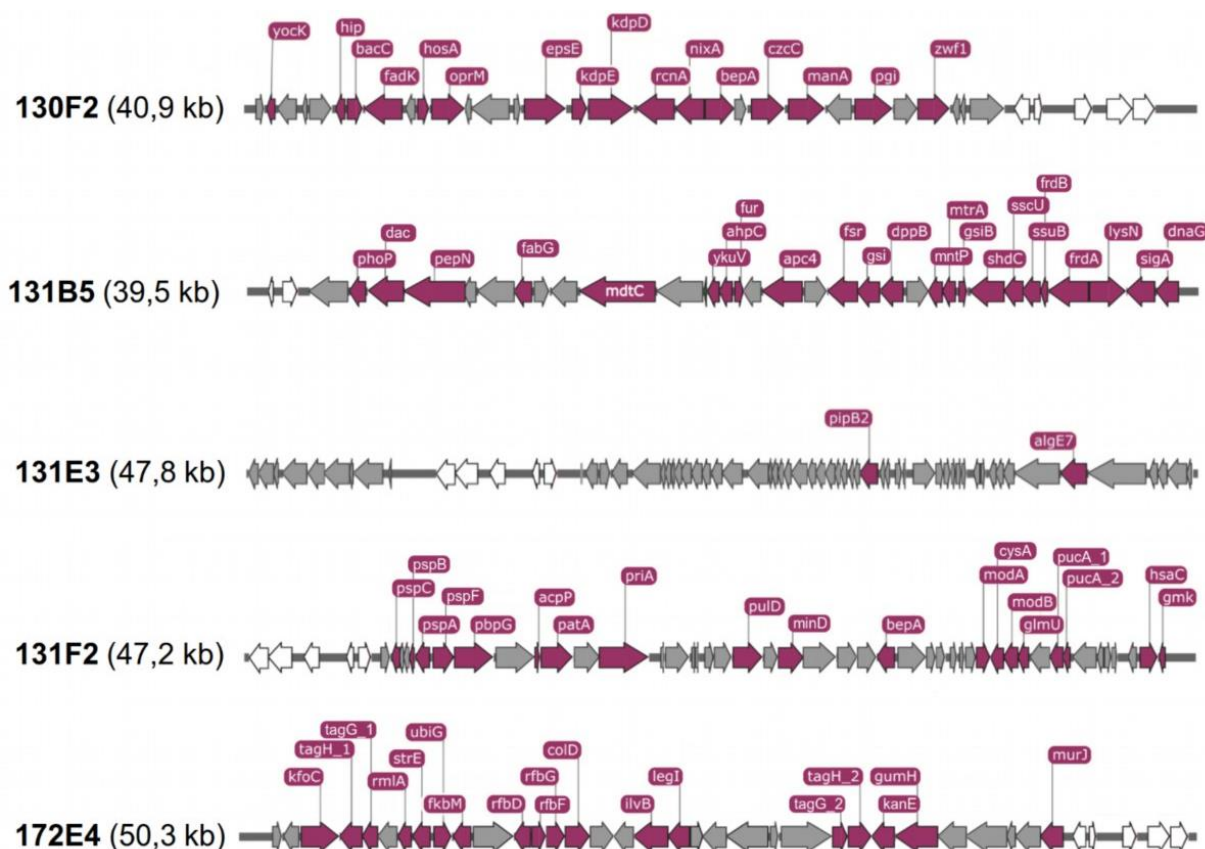

**Figure S2: Insert maps of the fosmid clones.** Sequences of fosmid clones displaying annotated genes (pink), unknown genes (grey) and genes from the fosmid backbone (white).

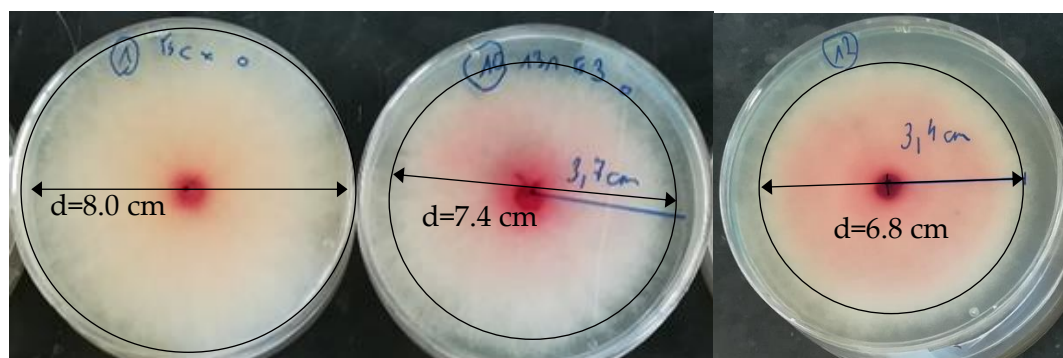

**Figure S3. Volatile inhibition of *F. culmorum*.** Growth inhibition of 7.5% by the metagenomic library clone *E. coli* EPI300 pCC2FOS 131 E3 (center and right) as compared to the empty vector control *E. coli* EPI300 pCC2FOS (left).

## VOCs profiling through SPME GC-MS

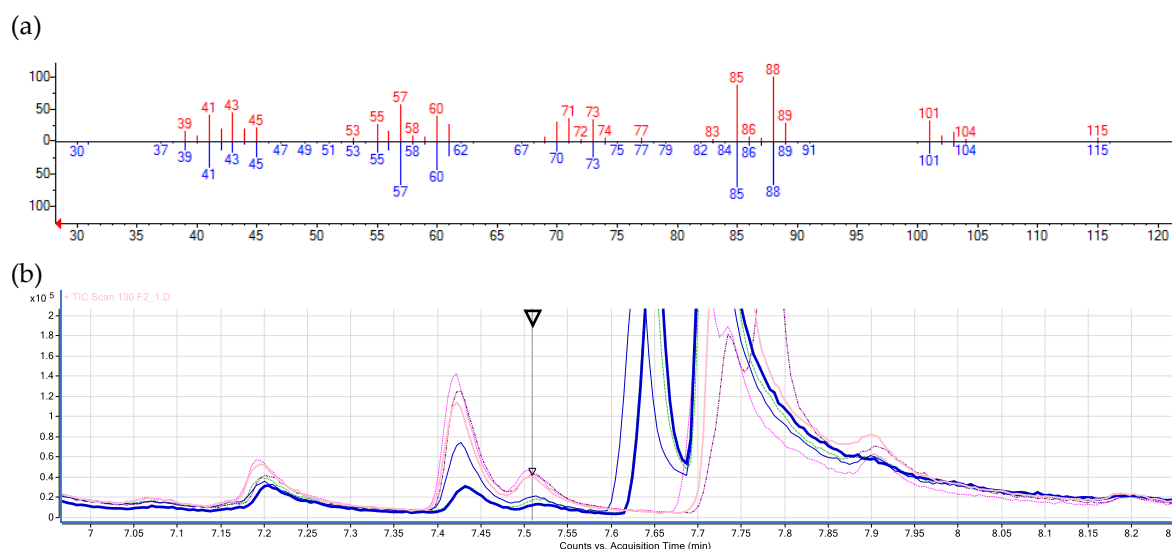

**FIGURE S4. Detection of valeric acid.** (a) Comparison of the recorded mass spectrum (red) and the spectrum of the NIST reference (blue) for valeric acid. (b) SPME GC-MS measurement displaying scans of the metagenomic clone (pink) as compared to the empty vector strain *E. coli* EPI300 pCC2FOS (blue and green) with sample size n=3. The arrow at retention time 7.509 minutes marks the significantly enriched peak, later identified as valeric acid.

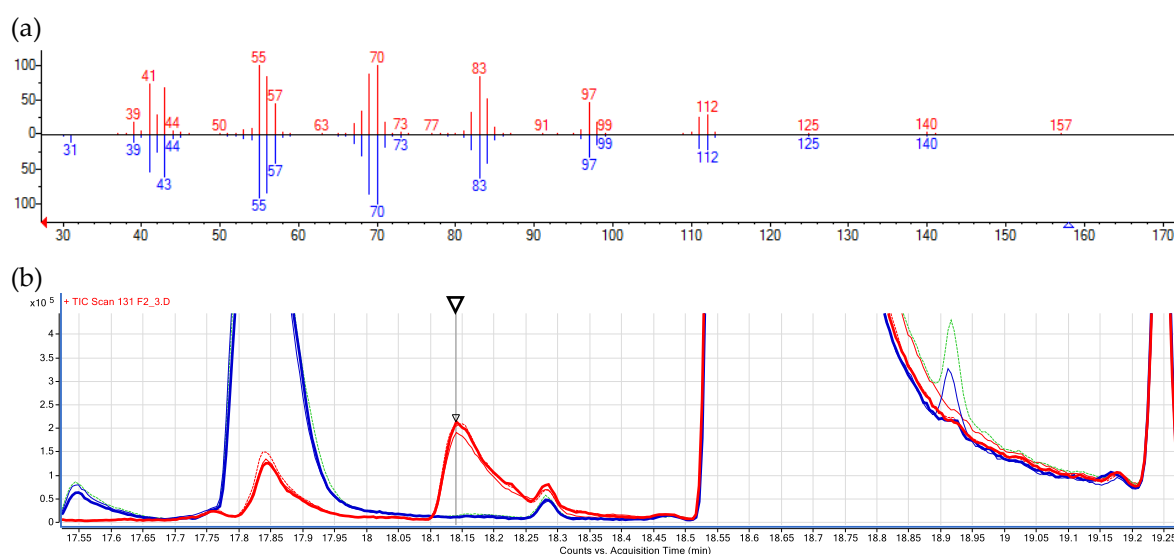

**FIGURE S5. Detection of 1-decanol.** (a) Comparison of the recorded mass spectrum (red) and the spectrum of the NIST reference (blue) for 1-decanol. (b) SPME GC-MS measurement displaying scans of the metagenomic clone (red) as compared to the empty vector strain *E. coli* EPI300 pCC2FOS (blue and green) with sample size n=3. The arrow at retention time 18.570 minutes marks the unique peak later identified as 1-decanol.

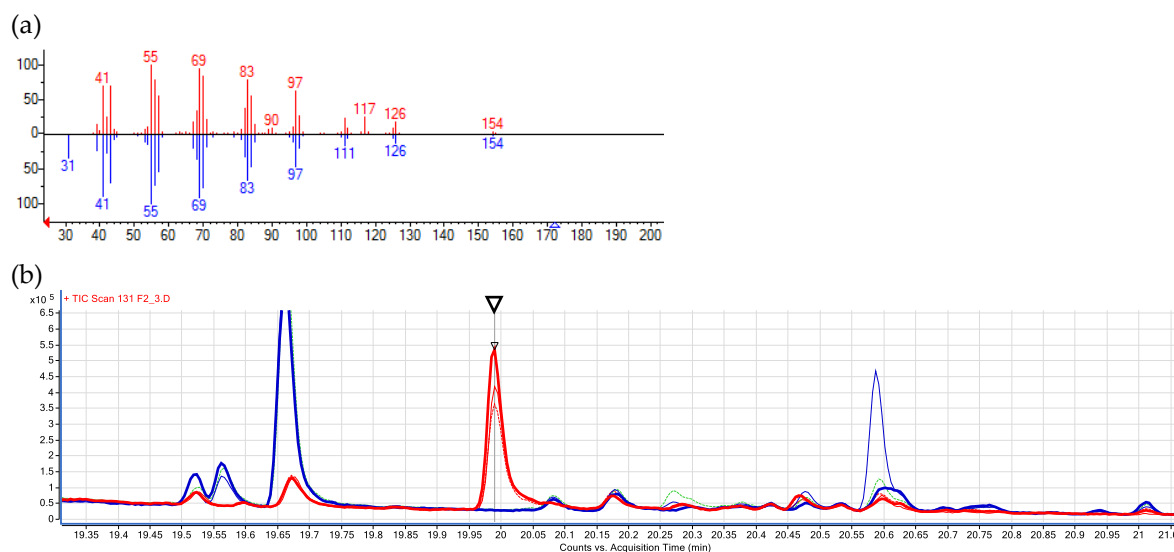

**FIGURE S6. Detection of 1-undecanol.** (a) Comparison of the recorded mass spectrum (red) and the spectrum of the NIST reference (blue) for 1-undecanol. (b) SPME GC-MS measurement displaying scans of the metagenomic clone (red) as compared to the empty vector strain *E. coli* EPI300 pCC2FOS (blue and green) with sample size  $n=3$ . The arrow at retention time 19.990 minutes marks the unique peak later identified as 1-undecanol.

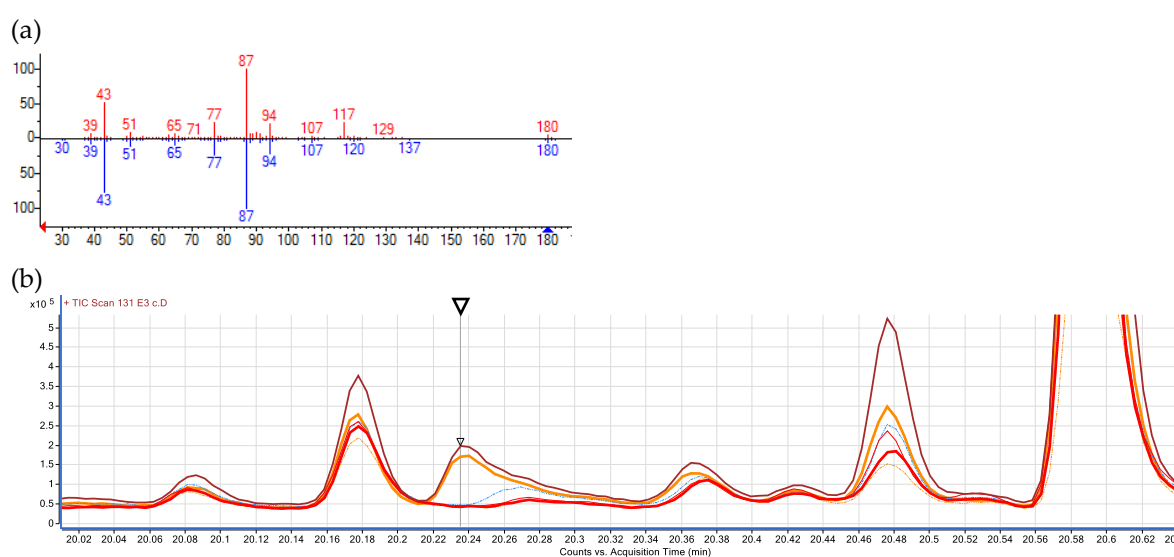

**FIGURE S7. Detection of 2-phenoxyethyl acetate.** (a) Comparison of the recorded mass spectrum (red) and the spectrum of the NIST reference (blue) for 2-phenoxyethyl acetate. (b) SPME GC-MS measurement displaying scans of the metagenomic clone (wine red to orange) as compared to the empty vector strain *E. coli* EPI300 pCC2FOS (blue and red) with sample size  $n=3$ . The arrow at retention time 20.235 minutes marks the unique peak later identified as 2-phenoxyethyl acetate.

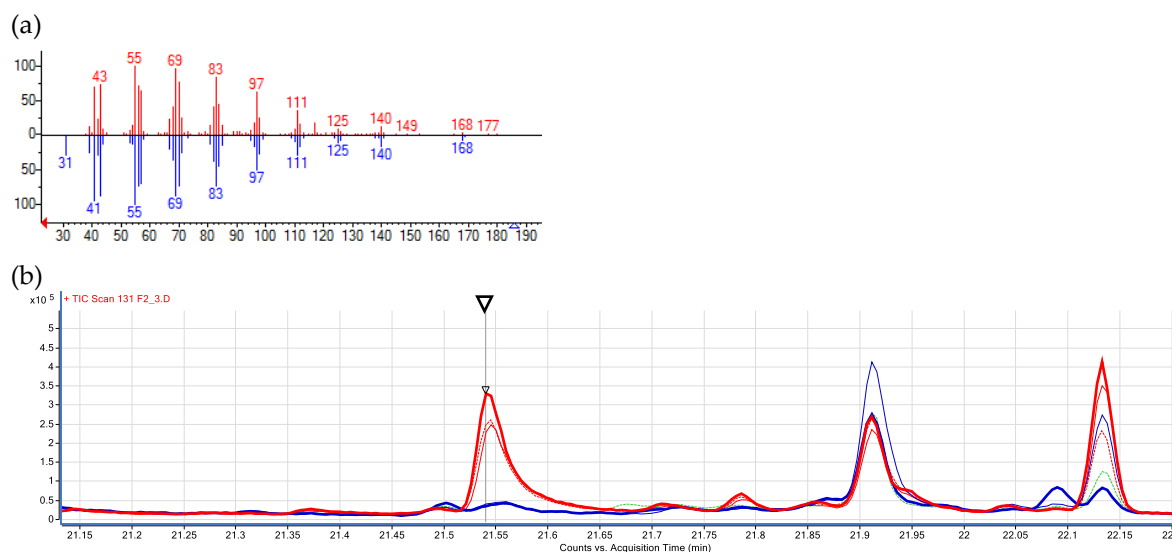

**FIGURE S8. Detection of 1-dodecanol.** (a) Comparison of the recorded mass spectrum (red) and the spectrum of the NIST reference (blue) for 1-dodecanol. (b) SPME GC-MS measurement displaying scans of the metagenomic clone (red) as compared to the empty vector strain *E. coli* EPI300 pCC2FOS (blue) with sample size  $n=3$ . The arrow at retention time 21.541 minutes marks the unique peak later identified as 1-dodecanol.

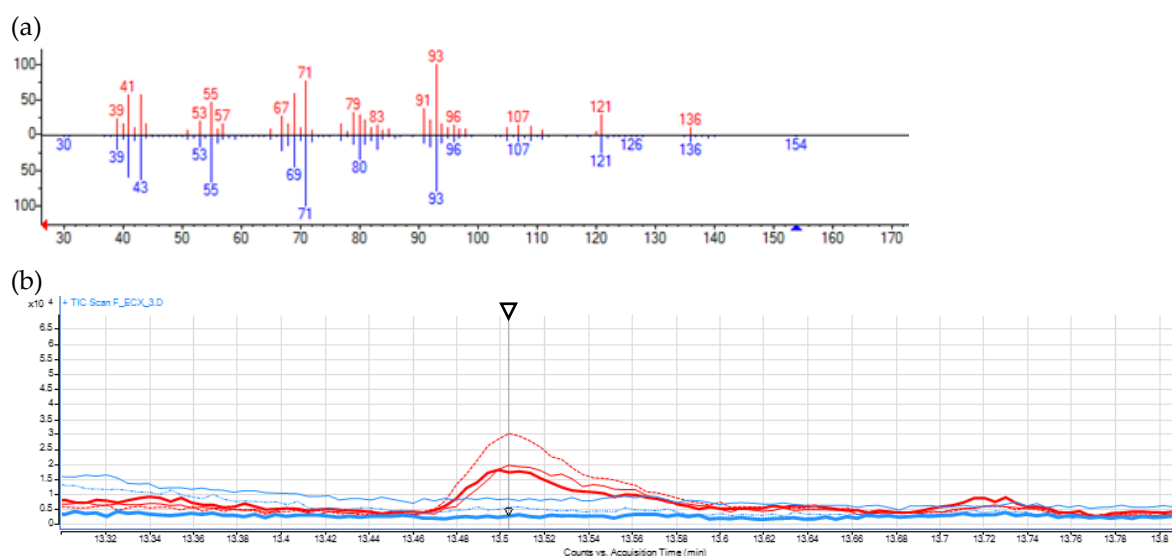

**FIGURE S9. Detection of linalool.** (a) Comparison of the recorded mass spectrum (red) and the spectrum of the NIST reference (blue) for linalool. (b) SPME GC-MS measurement displaying scans of the metagenomic clone (red) as compared to the empty vector strain *E. coli* EPI300 pCC2FOS (blue) with sample size  $n=3$ . The arrow at retention time 13.504 minutes marks the unique peak later identified as linalool.

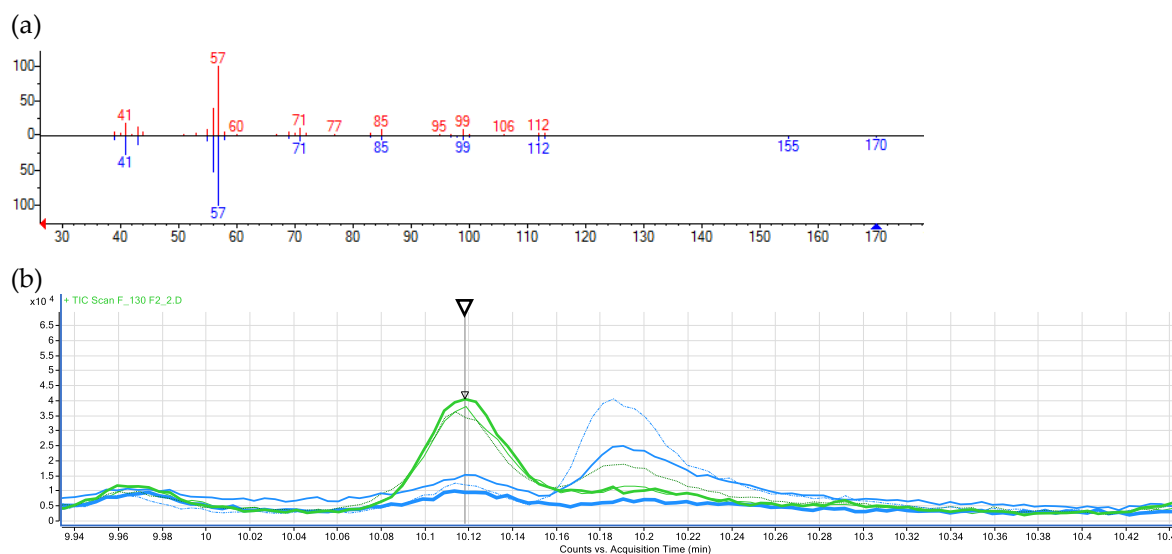

**FIGURE S10. Detection of 2,2,4,6,6-pentamethylheptane.** (a) Comparison of the recorded mass spectrum (red) and the spectrum of the NIST reference (blue) for 2,2,4,6,6-pentamethylheptane. (b) SPME GC-MS measurement displaying scans of the metagenomic clone (green) as compared to the empty vector strain *E. coli* EPI300 pCC2FOS (cyan) with sample size  $n=3$ . The arrow at retention time 10.119 minutes marks the unique peak later identified as 2,2,4,6,6-pentamethylheptane.

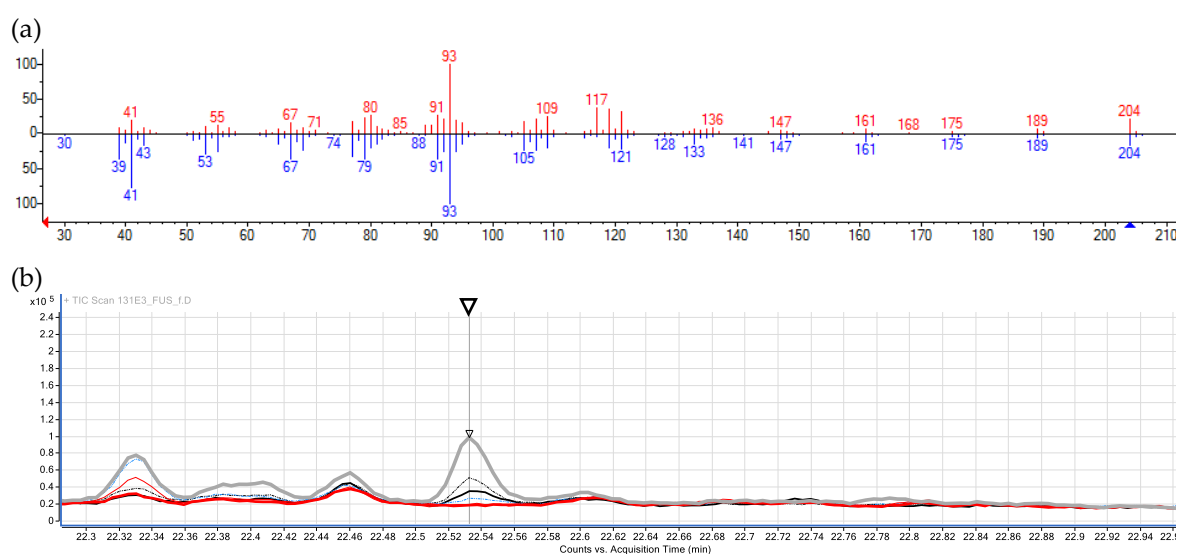

**FIGURE S11. Detection of  $\alpha$ -bisabolene.** (a) Comparison of the recorded mass spectrum (red) and the spectrum of the NIST reference (blue) for  $\alpha$ -bisabolene. (b) SPME GC-MS measurement displaying scans of the metagenomic clone (blue, grey and black) as compared to the empty vector strain *E. coli* EPI300 pCC2FOS (red) with sample size  $n=3$ . The arrow at retention time 22.533 minutes marks the unique peak later identified as  $\alpha$ -bisabolene.

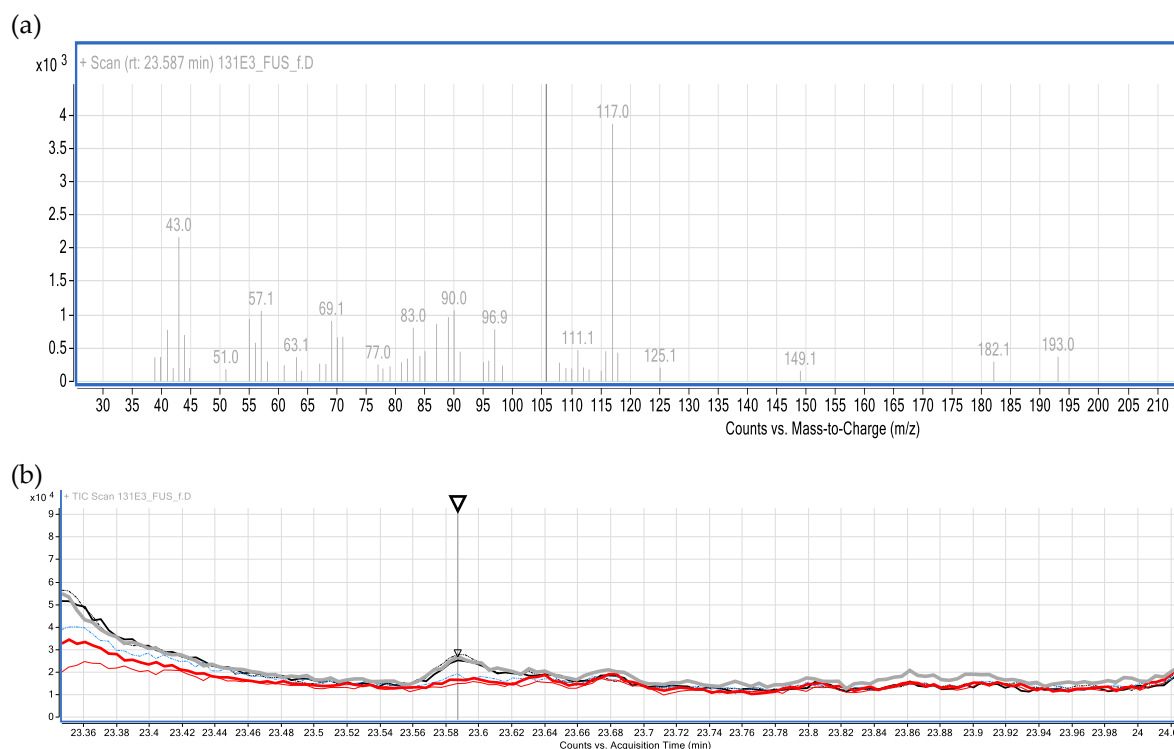

**FIGURE S12. Detection of a not identified substance produced during interaction between *F. culmorum* and metagenomic library clone 131 E3.** (a) The mass spectrum of the measured substance is depicted. (b) SPME GC-MS measurement displaying scans of the metagenomic clone (blue, grey and black) as compared to the empty vector strain *E. coli* EPI300 pCC2FOS (red) with sample size  $n=3$ . The arrow at retention time 23.587 minutes marks the unique peak later identified as an unknown substance.

## TABLES

Table S1. Inhibition efficacy for different concentrations of the detected substances against *F. culmorum*.

| Substance              | Amount of substance (μmol) | Concentration (mM) | Inhibition Rate (%) | Standard deviation (%) |
|------------------------|----------------------------|--------------------|---------------------|------------------------|
| 1-Undecanol            | 0.1                        | 0.7                | 0                   | 0                      |
|                        | 1                          | 6.7                | 0                   | 0                      |
|                        | 25                         | 166.7              | 0                   | 0                      |
|                        | 50                         | 333.3              | 0                   | 0                      |
|                        | 100                        | 666.7              | 0                   | 0                      |
|                        | 250                        | 1,666.7            | 0                   | 0                      |
|                        | 500                        | 3,333.3            | 3.1                 | 5.4                    |
|                        | 716                        | 4,773.3            | 48.2                | 5.6                    |
| 1-Decanol              | 0.1                        | 0.7                | 0                   | 0                      |
|                        | 1                          | 6.7                | 1.8                 | 2.5                    |
|                        | 25                         | 166.7              | 0.8                 | 0.7                    |
|                        | 50                         | 333.3              | 0                   | 0                      |
|                        | 100                        | 666.7              | 1.2                 | 1.2                    |
|                        | 250                        | 1,666.7            | 1.6                 | 1.8                    |
|                        | 500                        | 3,333.3            | 5.1                 | 3.8                    |
|                        | 770                        | 5,133.3            | 51.8                | 4.6                    |
| 1-Dodecanol            | 0.1                        | 0.7                | 2.4                 | 0                      |
|                        | 1                          | 6.7                | 0.4                 | 0.7                    |
|                        | 25                         | 166.7              | 1.6                 | 1.8                    |
|                        | 50                         | 333.3              | 2.0                 | 3.4                    |
|                        | 100                        | 666.7              | 3.5                 | 6.1                    |
|                        | 250                        | 1,666.7            | 10.2                | 3.6                    |
|                        | 500                        | 3,333.3            | 12.9                | 1.7                    |
|                        | 657                        | 4,380.0            | 14.3                | 9.3                    |
| 2-Phenoxyethyl acetate | 0.1                        | 0.7                | 4.7                 | 2.0                    |
|                        | 1                          | 6.7                | 0.4                 | 0.7                    |
|                        | 25                         | 166.7              | 1.6                 | 2.7                    |
|                        | 50                         | 333.3              | 0.4                 | 0.7                    |
|                        | 100                        | 666.7              | 1.2                 | 1.2                    |
|                        | 250                        | 1,666.7            | 2.4                 | 2.0                    |
|                        | 500                        | 3,333.3            | 2.4                 | 1.2                    |
|                        | 933                        | 6,220.0            | 25.0                | 7.1                    |
| α-Bisabolol            | 0.1                        | 0.7                | 0                   | 0                      |
|                        | 1                          | 6.7                | 0                   | 0                      |
|                        | 25                         | 166.7              | 0                   | 0                      |
|                        | 50                         | 333.3              | 0                   | 0                      |
|                        | 100                        | 666.7              | 0.4                 | 0.7                    |
|                        | 250                        | 1,666.7            | 0.6                 | 0.8                    |



|                                     |     |         |      |     |
|-------------------------------------|-----|---------|------|-----|
|                                     | 500 | 3,333.3 | 11.8 | 6.1 |
|                                     | 503 | 3,353.3 | 11.5 | 2.3 |
| <b>Linalool</b>                     | 0.1 | 0.7     | 5.1  | 3.6 |
|                                     | 1   | 6.7     | 17.6 | 5.4 |
|                                     | 25  | 166.7   | 38.8 | 7.3 |
|                                     | 50  | 333.3   | 69.0 | 6.9 |
|                                     | 100 | 666.7   | 84.7 | 7.1 |
|                                     | 250 | 1,666.7 | 100  | 0   |
|                                     | 500 | 3,333.3 | 100  | 0   |
|                                     | 812 | 5,413.3 | 100  | 0   |
| <b>2,2,4,6,6-Pentamethylheptane</b> | 0.1 | 0.7     | 0.4  | 0.7 |
|                                     | 1   | 6.7     | 0.8  | 1.4 |
|                                     | 25  | 166.7   | 0    | 0   |
|                                     | 50  | 333.3   | 0    | 0   |
|                                     | 100 | 666.7   | 0    | 0   |
|                                     | 250 | 1,666.7 | 0    | 0   |
|                                     | 500 | 3,333.3 | 0    | 0   |
|                                     | 647 | 4,313.3 | 11.3 | 2.6 |
| <b>Valeric acid</b>                 | 0.1 | 0.7     | 10.2 | 7.7 |
|                                     | 1   | 6.7     | 100  | 0   |
|                                     | 25  | 166.7   | 100  | 0   |
|                                     | 50  | 333.3   | 100  | 0   |
|                                     | 100 | 666.7   | 100  | 0   |
|                                     | 250 | 1,666.7 | 100  | 0   |
|                                     | 500 | 3,333.3 | 100  | 0   |

## References

- [1] Obermeier, M.M.; Wicaksono, W.A.; Taffner, J.; Bergna, A.; Poehlein, A.; Cernava, T.; Lindstaedt, S.; Lovric, M.; Müller Bogotá, C.A.; Berg, G. Plant resistome profiling in evolutionary old bog vegetation provides new clues to understand emergence of multi-resistance. *ISME J* (under review).
- [2] Bolger, A.M.; Lohse, M.; Usadel, B. Trimmomatic: a flexible trimmer for Illumina sequence data. *Bioinformatics* **2014**, *30*, 2114–20.
- [3] Bankevich, A.; Nurk, S.; Antipov, D.; Gurevich, A.A.; Dvorkin, M.; Kulikov, A.s.; Lesin,, V.M.; Nikolenko, S.I.; Pham, S.; Prjibelski, A.D.; Pyshkin, A.V.; Sirotkin, A.V.; Vyahhi, N.; Tesler, G.; Alekseyev, M.A.; Pevzner, P.A. SPAdes: a new genome assembly algorithm and its applications to single-cell sequencing. *J Comput Biol* **2012**, *19*, 455–77.
- [4] Seemann T. Prokka: rapid prokaryotic genome annotation. *Bioinformatics* **2014**, *30*, 2068–9.
